# Supplementary material for: Downsizing a human inflammatory protein to a small molecule with equal potency and functionality
Source: Springer Nature journal article supplement (doi:10.1038/ncomms3802), 2013-11-21
Supplement: 41467_2013_BFncomms3802_MOESM3_ESM.mol [file 41467_2013_BFncomms3802_MOESM3_ESM.mol]

  ChemDraw11011312362D

 28 28  0  0  0  0  0  0  0  0999 V2000
   -2.0704    1.2003    0.0000 C   0  0  0  0  0  0  0  0  0  0  0  0
   -1.5163    0.5852    0.0000 N   0  0  0  0  0  0  0  0  0  0  0  0
   -0.7604    0.9221    0.0000 C   0  0  0  0  0  0  0  0  0  0  0  0
   -0.8466    1.7453    0.0000 C   0  0  0  0  0  0  0  0  0  0  0  0
   -1.6565    1.9171    0.0000 O   0  0  0  0  0  0  0  0  0  0  0  0
   -2.8907    1.1141    0.0000 C   0  0  0  0  0  0  0  0  0  0  0  0
   -3.2264    0.3605    0.0000 N   0  0  0  0  0  0  0  0  0  0  0  0
   -3.3759    1.7815    0.0000 C   0  0  0  0  0  0  0  0  0  0  0  0
   -0.0460    0.5095    0.0000 C   0  0  0  0  0  0  0  0  0  0  0  0
    0.6681    0.9221    0.0000 N   0  0  0  0  0  0  0  0  0  0  0  0
   -0.0458   -0.3155    0.0000 O   0  0  0  0  0  0  0  0  0  0  0  0
    1.3826    0.5094    0.0000 C   0  0  0  0  0  0  0  0  0  0  0  0
    2.0971    0.9221    0.0000 C   0  0  0  0  0  0  0  0  0  0  0  0
    2.0971    1.7470    0.0000 O   0  0  0  0  0  0  0  0  0  0  0  0
    2.8117    0.5094    0.0000 O   0  0  0  0  0  0  0  0  0  0  0  0
    1.3826   -0.3155    0.0000 C   0  0  0  0  0  0  0  0  0  0  0  0
    2.0971   -0.7277    0.0000 C   0  0  0  0  0  0  0  0  0  0  0  0
    2.0971   -1.5526    0.0000 C   0  0  0  0  0  0  0  0  0  0  0  0
    2.8117   -1.9653    0.0000 N   0  0  0  0  0  0  0  0  0  0  0  0
    2.8117   -2.7902    0.0000 C   0  0  0  0  0  0  0  0  0  0  0  0
    3.5256   -3.2024    0.0000 N   0  0  0  0  0  0  0  0  0  0  0  0
    2.0971   -3.2024    0.0000 N   0  0  0  0  0  0  0  0  0  0  0  0
   -3.0406    2.5351    0.0000 C   0  0  0  0  0  0  0  0  0  0  0  0
   -3.5256    3.2024    0.0000 C   0  0  0  0  0  0  0  0  0  0  0  0
   -2.2202    2.6216    0.0000 C   0  0  0  0  0  0  0  0  0  0  0  0
   -2.7400   -0.3093    0.0000 C   0  0  0  0  0  0  0  0  0  0  0  0
   -3.0768   -1.0654    0.0000 O   0  0  0  0  0  0  0  0  0  0  0  0
   -1.9168   -0.2229    0.0000 C   0  0  0  0  0  0  0  0  0  0  0  0
  1  2  2  0      
  2  3  1  0      
  3  4  2  0      
  4  5  1  0      
  5  1  1  0      
  1  6  1  0      
  6  7  1  0      
  6  8  1  1      
  3  9  1  0      
  9 10  1  0      
  9 11  2  0      
 10 12  1  0      
 12 13  1  0      
 13 14  2  0      
 13 15  1  0      
 12 16  1  6      
 16 17  1  0      
 17 18  1  0      
 18 19  1  0      
 19 20  1  0      
 20 21  1  0      
 20 22  2  0      
  8 23  1  0      
 23 24  1  0      
 23 25  1  0      
  7 26  1  0      
 26 27  2  0      
 26 28  1  0      
M  END
